# Supplementary material for: Surface Functionalised Optical Fibre for Detection of Hydrogen Sulphide
Source: MDPI journal article supplement (doi:10.3390/bios13110949), 2023-10-24
Supplement: s1 [file s1]

## Article

# Surface Functionalised Optical Fibre for Detection of Hydrogen Sulphide

Shaghayegh Baghapour <sup>1,\*</sup>, Jasmine Nehema <sup>2</sup>, Wen Qi Zhang <sup>1,3</sup>, Stephen C. Warren-Smith <sup>1,3</sup>, Shane M. Hickey <sup>2</sup>, Sally E. Plush <sup>2</sup> and Shahrām Afshar Vahid <sup>1</sup>

<sup>1</sup> Laser Physics and Photonic Devices Laboratory, UniSA STEM, University of South Australia, Adelaide, SA 5095, Australia

<sup>2</sup> Clinical and Health Sciences, University of South Australia, Adelaide, SA 5000, Australia

<sup>3</sup> Future Industries Institute, University of South Australia, Adelaide, SA 5095, Australia

\* Correspondence: shaghayegh.baghapour@mymail.unisa.edu.au

## <sup>1</sup>H NMR and <sup>13</sup>C NMR of Compounds

Figures S1 to S8 represent <sup>1</sup>H NMR and <sup>13</sup>C NMR data of compounds 1, 2, 4 and 5.

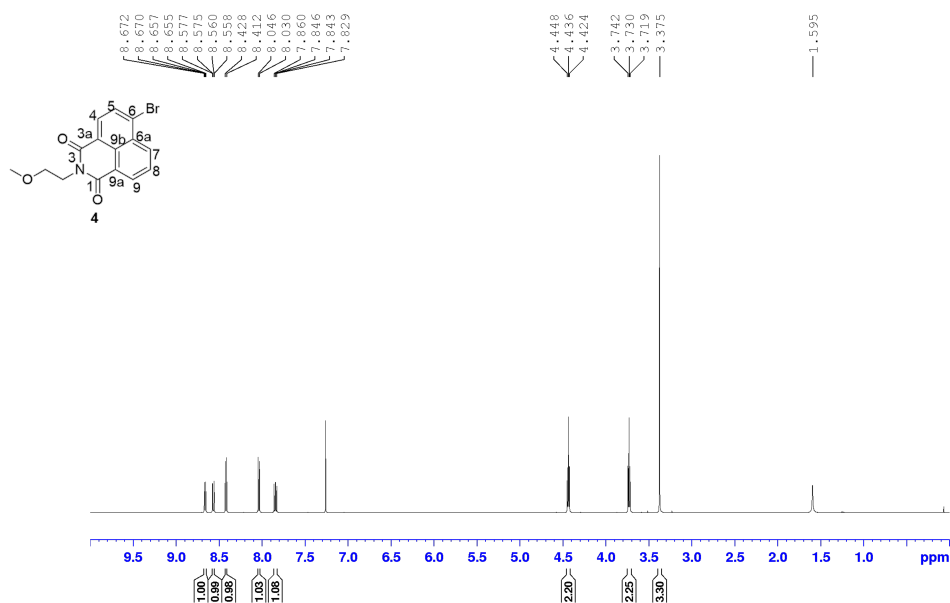

Figure S1. <sup>1</sup>H NMR (500 MHz) spectra of 4 in CDCl<sub>3</sub>.

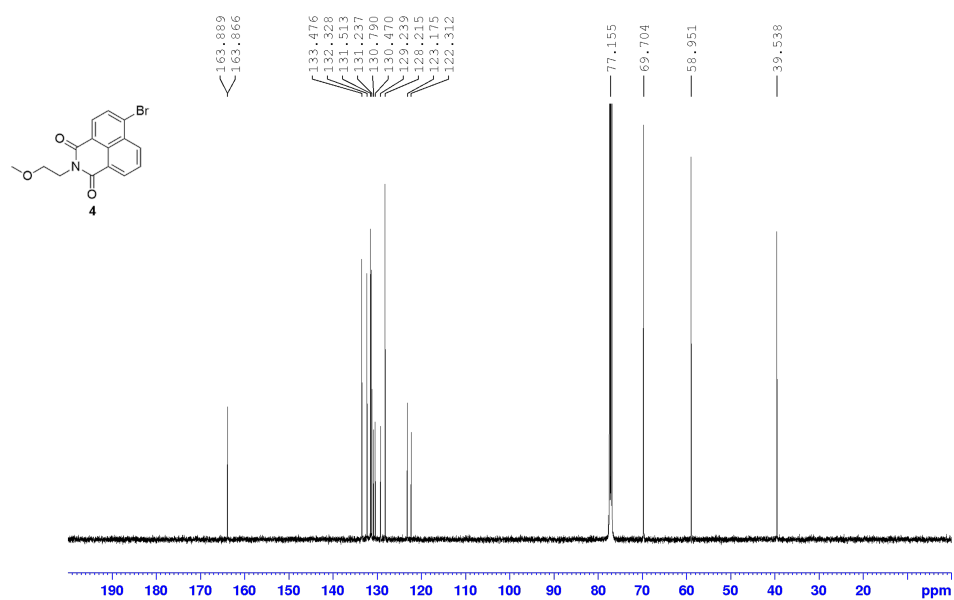

Figure S2.  $^{13}\text{C}$  NMR (125 MHz) spectra of **4** in  $\text{CDCl}_3$ .

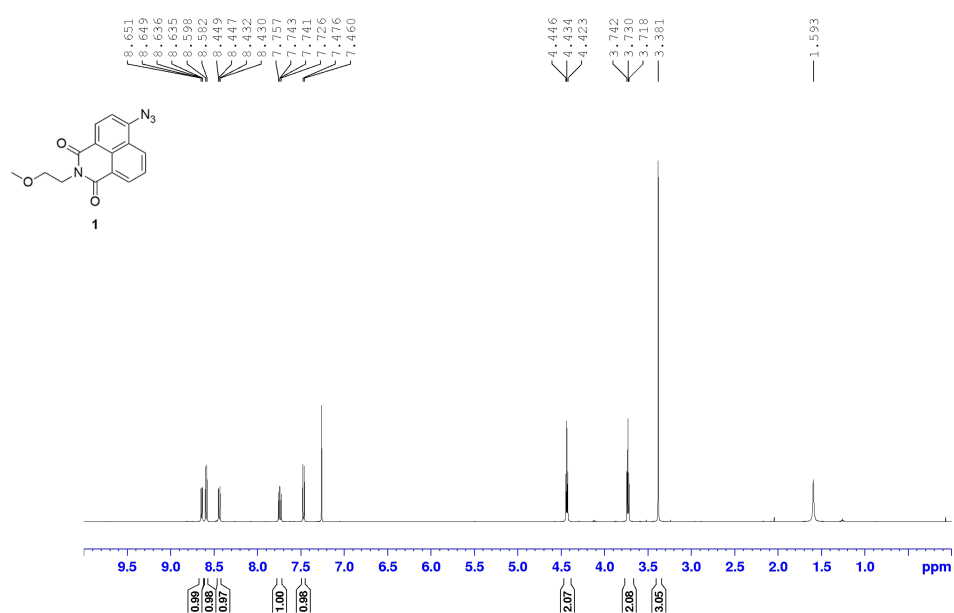

Figure S3.  $^1\text{H}$  NMR (500 MHz) spectra of **1** in  $\text{CDCl}_3$ .

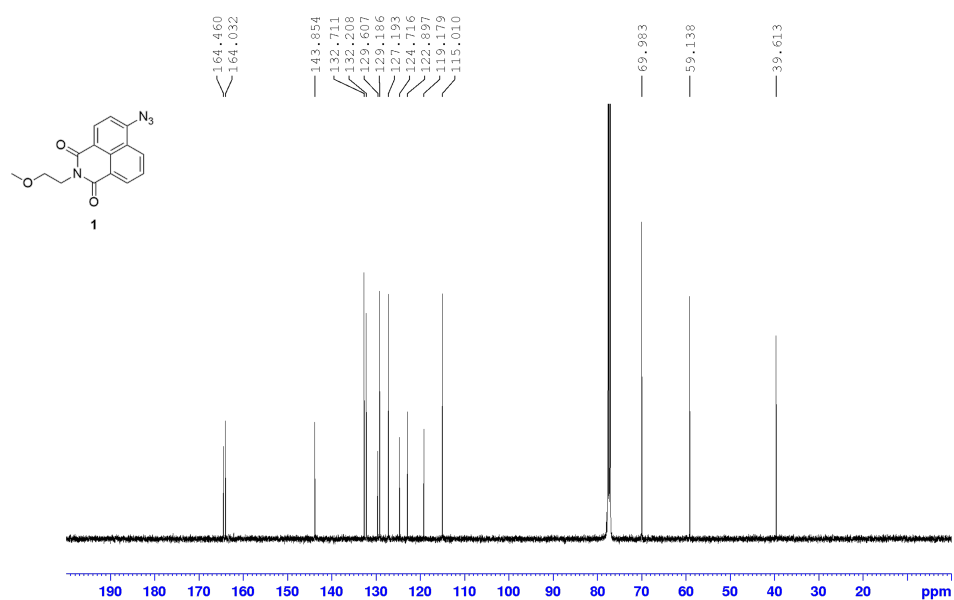

Figure S4. <sup>13</sup>C NMR (125 MHz) spectra of **1** in CDCl<sub>3</sub>.

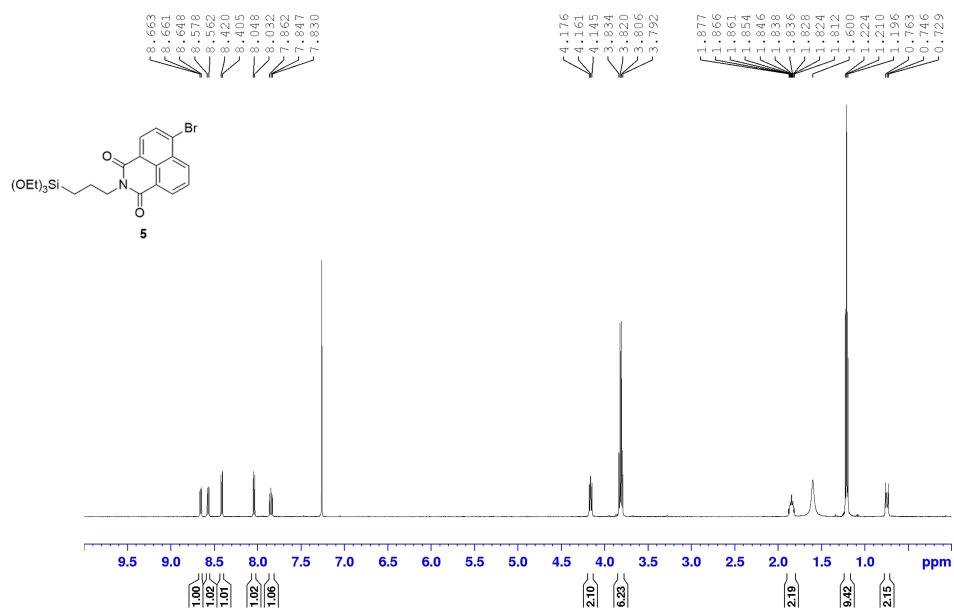

Figure S5. <sup>1</sup>H NMR (500 MHz) spectra of **5** in CDCl<sub>3</sub>.

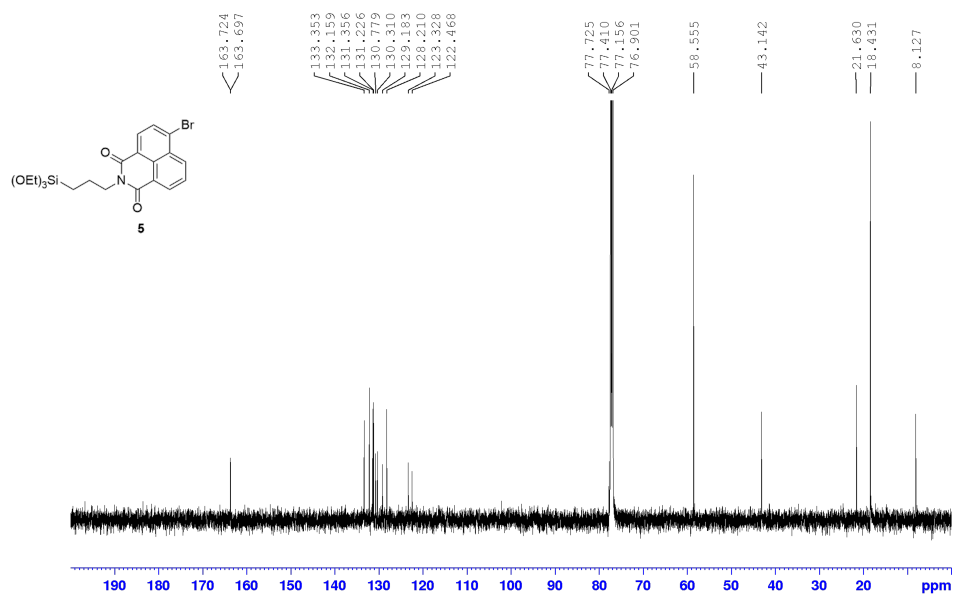

Figure S6. <sup>13</sup>C NMR (125 MHz) spectra of **5** in CDCl<sub>3</sub>.

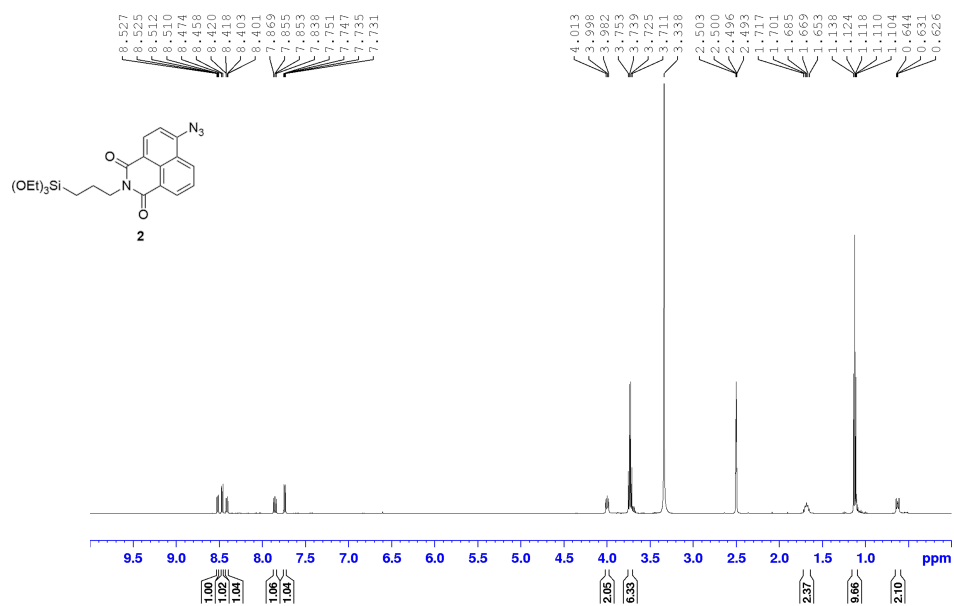

Figure S7. <sup>1</sup>H NMR (500 MHz) spectra of **2** in DMSO-*d*<sub>6</sub>.

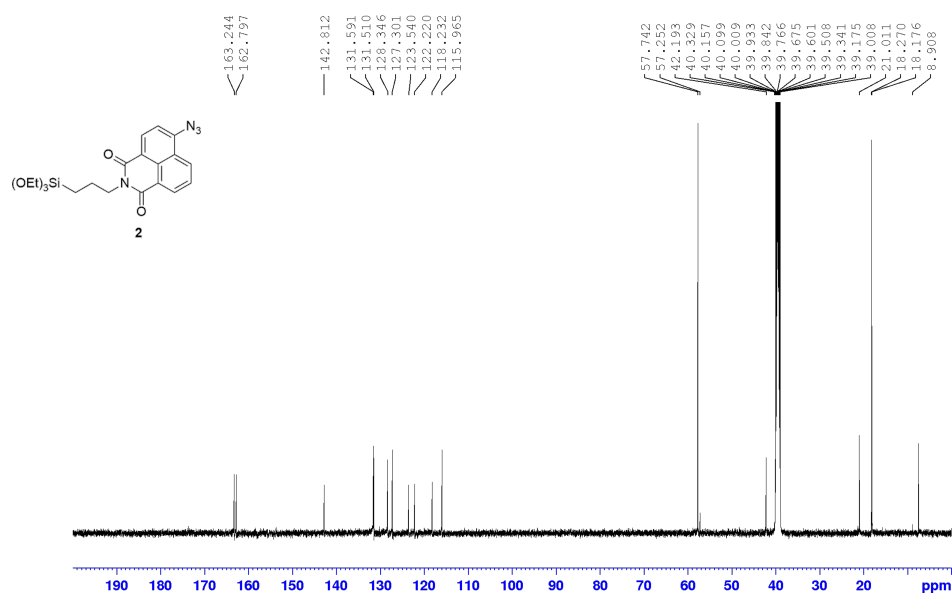

Figure S8.  $^{13}\text{C}$  NMR (125MHz) spectra of **2** in in  $\text{DMSO-}d_6$ .

### Coating setup

Figure S9 shows the coating solution tube with optical fibres inside. A septa with needle was used to cap the tube. The tube was placed on a heater for  $70^\circ\text{C}$ .

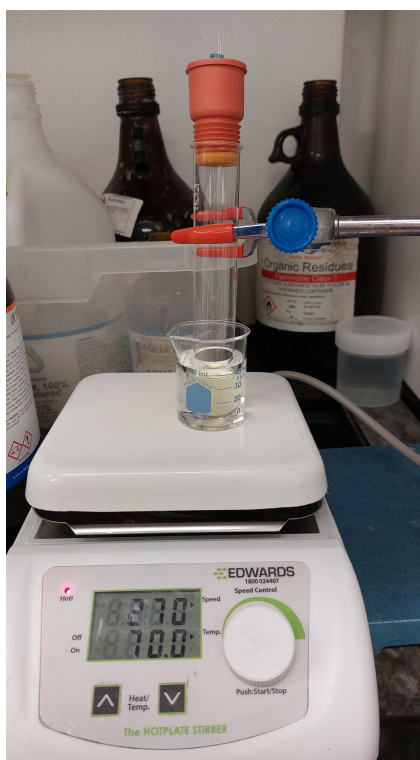

Figure S9. Coating setup. A glass tube containing the coating solution with optical fibres.

### HR XP Spectra of C 1s, O 1s, Si 2p and N 1s of Control and Coated Fibres

Figure S10 presents the high-resolution spectra of C 1s, O 1s, Si 2p, and N 1s for control optical fibers.

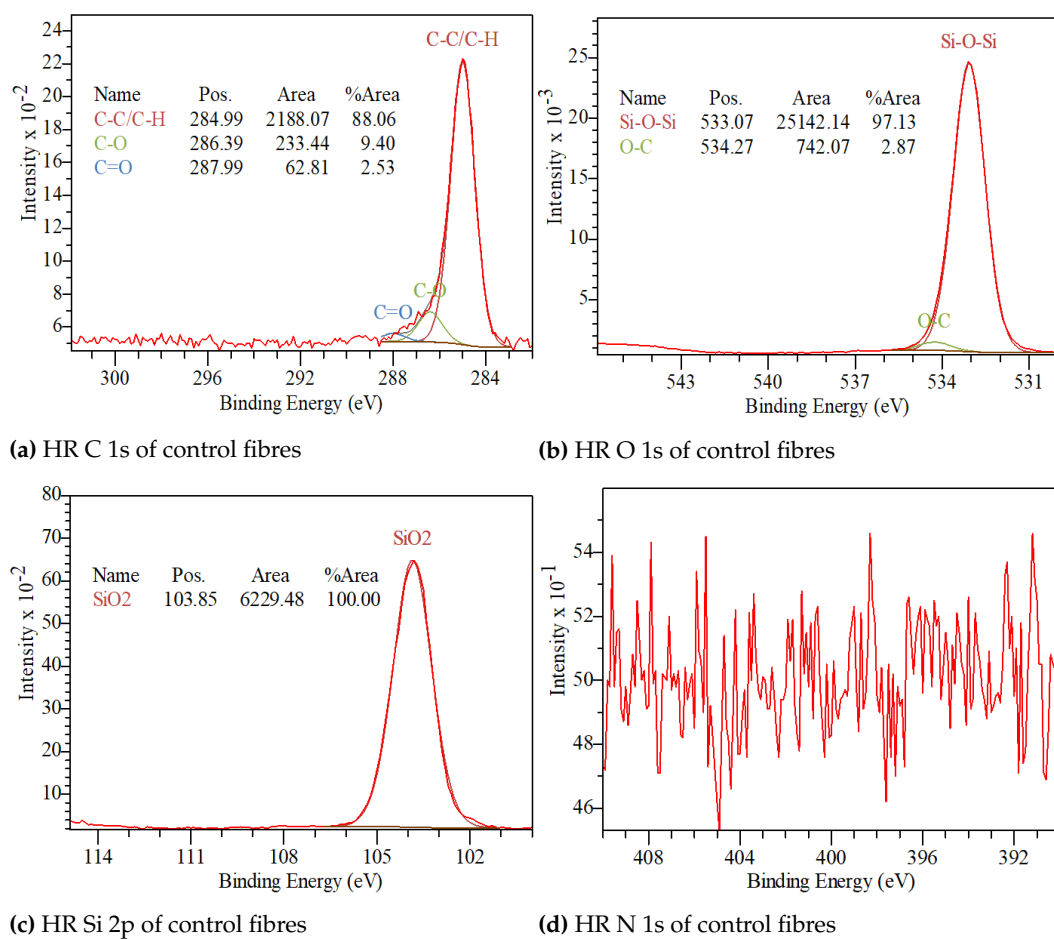

**Figure S10.** High resolution spectra of C 1s, O 1s, Si 2p and N 1s of control fibres.

Figure S11 presents the high-resolution spectra of C 1s, O 1s, Si 2p, and N 1s for coated optical fibers.

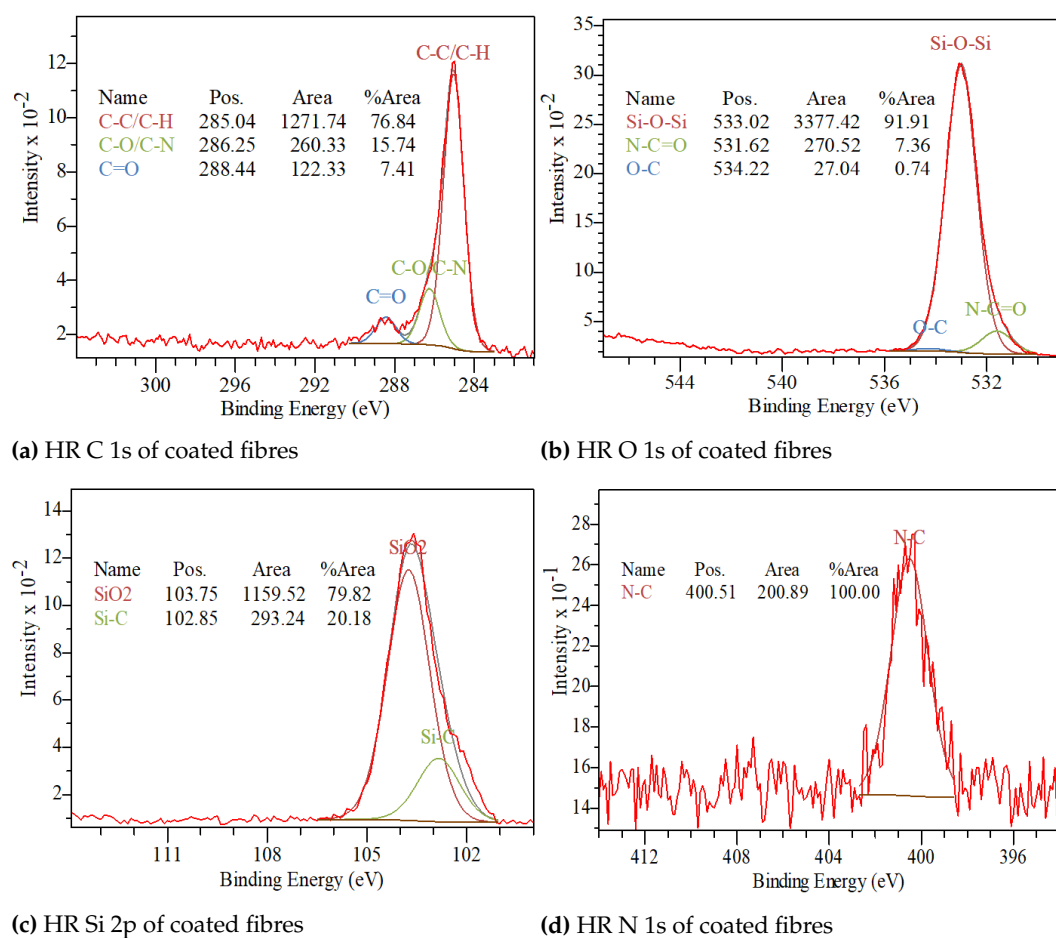

**Figure S11.** High resolution spectra of C 1s, O 1s, Si 2p and N 1s of coated fibres.
